# Supplementary material for: The effect of an image of watchful eyes on the evaluation of the appearance of food
Source: PeerJ. 2020 Aug 28;8:e9804. doi: 10.7717/peerj.9804 (PMC7457924; doi:10.7717/peerj.9804)
Supplement: Supplemental Information 1 [file peerj-08-9804-s001.xlsx]

## Sheet: Sheet1
Sub	eyes	foods	Res	RT	relax
1	Open	new\food\orange.jpg	4	1.54069	4
1	Open	new\food\parfait.jpg	8	1.2867	4
1	Open	new\food\tomato.jpg	1	1.12471	5
1	Open	new\food\chocolatecake.jpg	8	2.84047	4
1	Open	new\food\pancake.jpg	4	0.502544	3
1	Open	new\food\croissant.jpg	1	0.77393	4
1	Open	new\food\pancake.jpg	4	2.05645	5
1	Open	new\food\chocolateice.jpg	8	1.59864	5
1	Open	new\food\donut.jpg	7	1.65304	4
1	Open	new\food\strawberry.jpg	4	1.80632	3
1	Open	new\food\macaroni.jpg	7	2.55239	4
1	Open	new\food\kissh.jpg	4	1.90502	5
1	Open	new\food\chocolateice.jpg	4	0.869281	6
1	Open	new\food\donut.jpg	8	1.60935	3
1	Open	new\food\shushimaki.jpg	1	0.933739	4
1	Open	new\food\parfait.jpg	8	0.952751	5
1	Open	new\food\macaroni.jpg	8	1.30722	5
1	Open	new\food\cherry.jpg	9	1.16916	6
1	Open	new\food\shushi.jpg	9	2.50883	3
1	Open	new\food\shushi.jpg	9	1.3082	4
1	Open	new\food\hamburger.jpg	8	1.20294	3
1	Open	new\food\pizza.jpg	9	1.45649	4
1	Open	new\food\past.jpg	4	1.05239	2
1	Open	new\food\shushimaki.jpg	3	1.56749	3
1	Open	new\food\pie.jpg	1	4.64162	3
1	Open	new\food\hamburger.jpg	7	2.09132	4
1	Open	new\food\chocolatecake.jpg	7	1.25536	5
1	Open	new\food\croissant.jpg	1	1.35832	4
1	Open	new\food\ice.jpg	6	1.90094	3
1	Open	new\food\steak.jpg	7	1.92295	5
1	Open	new\food\kissh.jpg	4	3.17292	3
1	Open	new\food\strawberry.jpg	5	1.62309	4
1	Open	new\food\tomato.jpg	1	0.907239	3
1	Open	new\food\cherry.jpg	9	3.98613	2
1	Open	new\food\steak.jpg	8	1.49942	3
1	Open	new\food\ice.jpg	4	1.61561	3
1	Open	new\food\past.jpg	3	2.03557	4
1	Open	new\food\pizza.jpg	8	1.3649	5
1	Open	new\food\pie.jpg	4	1.30426	4
1	Open	new\food\orange.jpg	1	1.15654	4
1	Close	new\food\shushimaki.jpg	1	1.41973	5
1	Close	new\food\kissh.jpg	4	1.80537	4
1	Close	new\food\tomato.jpg	1	1.35677	6
1	Close	new\food\parfait.jpg	8	1.69365	6
1	Close	new\food\chocolateice.jpg	1	0.95251	5
1	Close	new\food\shushi.jpg	8	1.30295	6
1	Close	new\food\pancake.jpg	4	1.68589	4
1	Close	new\food\pancake.jpg	1	0.907375	4
1	Close	new\food\donut.jpg	3	1.41976	5
1	Close	new\food\croissant.jpg	4	1.79114	6
1	Close	new\food\hamburger.jpg	7	6.00378	3
1	Close	new\food\pizza.jpg	9	1.52314	5
1	Close	new\food\orange.jpg	6	2.08655	6
1	Close	new\food\orange.jpg	6	3.84712	6
1	Close	new\food\ice.jpg	3	3.6197	5
1	Close	new\food\ice.jpg	4	1.67104	4
1	Close	new\food\shushi.jpg	9	1.55872	3
1	Close	new\food\cherry.jpg	8	1.55323	4
1	Close	new\food\shushimaki.jpg	3	1.96477	5
1	Close	new\food\kissh.jpg	4	1.5567	4
1	Close	new\food\chocolateice.jpg	8	1.26965	5
1	Close	new\food\strawberry.jpg	7	1.80279	5
1	Close	new\food\steak.jpg	7	1.68828	6
1	Close	new\food\past.jpg	4	1.00048	4
1	Close	new\food\hamburger.jpg	7	2.18912	6
1	Close	new\food\strawberry.jpg	4	1.55352	4
1	Close	new\food\steak.jpg	7	1.44027	5
1	Close	new\food\donut.jpg	3	3.76978	6
1	Close	new\food\chocolatecake.jpg	9	3.55684	4
1	Close	new\food\macaroni.jpg	8	3.52658	3
1	Close	new\food\tomato.jpg	1	2.74137	4
1	Close	new\food\croissant.jpg	4	3.27996	4
1	Close	new\food\macaroni.jpg	8	2.25846	4
1	Close	new\food\chocolatecake.jpg	7	2.72294	5
1	Close	new\food\past.jpg	4	2.47141	3
1	Close	new\food\parfait.jpg	6	1.83905	2
1	Close	new\food\pie.jpg	4	1.60543	4
1	Close	new\food\pie.jpg	4	1.02269	5
1	Close	new\food\pizza.jpg	9	0.623567	3
1	Close	new\food\cherry.jpg	9	2.33303	4
2	Open	new\food\orange.jpg	7	1.16593	5
2	Open	new\food\parfait.jpg	6	1.16706	2
2	Open	new\food\tomato.jpg	4	1.13217	5
2	Open	new\food\chocolatecake.jpg	5	1.12487	4
2	Open	new\food\pancake.jpg	4	1.06698	3
2	Open	new\food\croissant.jpg	6	1.41585	4
2	Open	new\food\pancake.jpg	5	1.15062	3
2	Open	new\food\chocolateice.jpg	2	1.01737	5
2	Open	new\food\donut.jpg	2	1.14303	3
2	Open	new\food\strawberry.jpg	6	1.1708	4
2	Open	new\food\macaroni.jpg	7	0.933252	5
2	Open	new\food\kissh.jpg	4	1.22454	3
2	Open	new\food\chocolateice.jpg	3	1.06745	2
2	Open	new\food\donut.jpg	2	1.06653	5
2	Open	new\food\shushimaki.jpg	3	1.33423	3
2	Open	new\food\parfait.jpg	6	1.03324	4
2	Open	new\food\macaroni.jpg	7	1.27281	3
2	Open	new\food\cherry.jpg	3	1.20075	5
2	Open	new\food\shushi.jpg	4	0.999565	5
2	Open	new\food\shushi.jpg	4	1.18253	3
2	Open	new\food\hamburger.jpg	3	1.09954	6
2	Open	new\food\pizza.jpg	7	1.0082	6
2	Open	new\food\past.jpg	6	1.00058	4
2	Open	new\food\shushimaki.jpg	3	1.46748	4
2	Open	new\food\pie.jpg	4	1.10847	4
2	Open	new\food\hamburger.jpg	3	0.949569	4
2	Open	new\food\chocolatecake.jpg	5	1.02486	4
2	Open	new\food\croissant.jpg	3	1.22227	4
2	Open	new\food\ice.jpg	4	1.23335	5
2	Open	new\food\steak.jpg	6	1.1076	4
2	Open	new\food\kissh.jpg	3	1.30758	4
2	Open	new\food\strawberry.jpg	7	1.27202	4
2	Open	new\food\tomato.jpg	4	1.06563	3
2	Open	new\food\cherry.jpg	3	1.25062	5
2	Open	new\food\steak.jpg	6	0.938174	5
2	Open	new\food\ice.jpg	6	1.05078	5
2	Open	new\food\past.jpg	6	0.950751	3
2	Open	new\food\pizza.jpg	6	1.35666	4
2	Open	new\food\pie.jpg	3	1.1086	3
2	Open	new\food\orange.jpg	3	1.66585	4
2	Close	new\food\shushimaki.jpg	3	0.984753	5
2	Close	new\food\kissh.jpg	6	1.60662	3
2	Close	new\food\tomato.jpg	4	1.69145	3
2	Close	new\food\parfait.jpg	7	1.26754	3
2	Close	new\food\chocolateice.jpg	4	1.251	3
2	Close	new\food\shushi.jpg	5	1.20857	3
2	Close	new\food\pancake.jpg	4	1.30908	3
2	Close	new\food\pancake.jpg	6	1.01747	3
2	Close	new\food\donut.jpg	2	1.46691	5
2	Close	new\food\croissant.jpg	2	1.04934	4
2	Close	new\food\hamburger.jpg	4	1.2816	5
2	Close	new\food\pizza.jpg	7	1.02541	5
2	Close	new\food\orange.jpg	7	1.28607	4
2	Close	new\food\orange.jpg	7	1.11619	5
2	Close	new\food\ice.jpg	6	1.10107	5
2	Close	new\food\ice.jpg	6	1.21753	5
2	Close	new\food\shushi.jpg	4	1.01658	3
2	Close	new\food\cherry.jpg	3	1.1676	5
2	Close	new\food\shushimaki.jpg	3	1.40086	3
2	Close	new\food\kissh.jpg	6	0.957973	5
2	Close	new\food\chocolateice.jpg	3	1.20019	3
2	Close	new\food\strawberry.jpg	6	1.15057	4
2	Close	new\food\steak.jpg	6	1.50848	3
2	Close	new\food\past.jpg	4	1.04788	5
2	Close	new\food\hamburger.jpg	3	1.33352	5
2	Close	new\food\strawberry.jpg	6	1.06649	6
2	Close	new\food\steak.jpg	6	1.04089	5
2	Close	new\food\donut.jpg	2	1.13362	5
2	Close	new\food\chocolatecake.jpg	5	1.30259	4
2	Close	new\food\macaroni.jpg	7	0.933277	3
2	Close	new\food\tomato.jpg	4	0.982627	3
2	Close	new\food\croissant.jpg	2	1.11598	4
2	Close	new\food\macaroni.jpg	7	1.03327	5
2	Close	new\food\chocolatecake.jpg	6	1.22462	4
2	Close	new\food\past.jpg	6	1.23237	5
2	Close	new\food\parfait.jpg	6	1.38313	2
2	Close	new\food\pie.jpg	3	1.27253	2
2	Close	new\food\pie.jpg	5	1.17536	2
2	Close	new\food\pizza.jpg	7	1.2083	2
2	Close	new\food\cherry.jpg	3	3.23562	5
3	Open	new\food\orange.jpg	9	1.6651	5
3	Open	new\food\parfait.jpg	7	1.95017	3
3	Open	new\food\tomato.jpg	5	1.19203	4
3	Open	new\food\chocolatecake.jpg	8	2.04156	5
3	Open	new\food\pancake.jpg	6	2.34949	3
3	Open	new\food\croissant.jpg	7	1.6161	4
3	Open	new\food\pancake.jpg	7	1.16699	5
3	Open	new\food\chocolateice.jpg	9	1.38305	5
3	Open	new\food\donut.jpg	7	1.14953	5
3	Open	new\food\strawberry.jpg	9	1.61515	4
3	Open	new\food\macaroni.jpg	4	1.14933	4
3	Open	new\food\kissh.jpg	4	1.07401	5
3	Open	new\food\chocolateice.jpg	7	1.28404	4
3	Open	new\food\donut.jpg	8	2.34974	2
3	Open	new\food\shushimaki.jpg	4	1.1841	4
3	Open	new\food\parfait.jpg	8	2.1347	5
3	Open	new\food\macaroni.jpg	5	1.54861	4
3	Open	new\food\cherry.jpg	8	0.683904	5
3	Open	new\food\shushi.jpg	4	1.68267	5
3	Open	new\food\shushi.jpg	5	1.58203	5
3	Open	new\food\hamburger.jpg	8	0.599166	5
3	Open	new\food\pizza.jpg	5	2.09164	4
3	Open	new\food\past.jpg	5	1.15052	3
3	Open	new\food\shushimaki.jpg	4	2.1842	4
3	Open	new\food\pie.jpg	8	1.54146	5
3	Open	new\food\hamburger.jpg	9	1.64962	4
3	Open	new\food\chocolatecake.jpg	7	1.00858	3
3	Open	new\food\croissant.jpg	8	2.74927	3
3	Open	new\food\ice.jpg	8	0.800669	4
3	Open	new\food\steak.jpg	7	2.85737	5
3	Open	new\food\kissh.jpg	4	0.90772	4
3	Open	new\food\strawberry.jpg	8	0.715838	4
3	Open	new\food\tomato.jpg	4	1.75876	3
3	Open	new\food\cherry.jpg	9	1.65067	4
3	Open	new\food\steak.jpg	5	2.50736	5
3	Open	new\food\ice.jpg	8	1.61765	3
3	Open	new\food\past.jpg	5	2.16633	5
3	Open	new\food\pizza.jpg	5	1.35837	5
3	Open	new\food\pie.jpg	8	1.74031	3
3	Open	new\food\orange.jpg	9	1.39886	5
3	Close	new\food\shushimaki.jpg	4	1.2508	5
3	Close	new\food\kissh.jpg	5	1.67417	4
3	Close	new\food\tomato.jpg	4	1.04912	4
3	Close	new\food\parfait.jpg	7	2.15111	4
3	Close	new\food\chocolateice.jpg	8	1.23408	3
3	Close	new\food\shushi.jpg	4	1.09937	3
3	Close	new\food\pancake.jpg	7	1.98394	2
3	Close	new\food\pancake.jpg	6	1.31722	3
3	Close	new\food\donut.jpg	8	2.16626	4
3	Close	new\food\croissant.jpg	7	1.51553	5
3	Close	new\food\hamburger.jpg	8	2.04986	3
3	Close	new\food\pizza.jpg	5	1.19193	4
3	Close	new\food\orange.jpg	4	1.69921	2
3	Close	new\food\orange.jpg	9	1.0659	5
3	Close	new\food\ice.jpg	8	0.834174	2
3	Close	new\food\ice.jpg	9	1.31772	2
3	Close	new\food\shushi.jpg	4	1.59983	2
3	Close	new\food\cherry.jpg	8	1.08335	4
3	Close	new\food\shushimaki.jpg	3	0.884151	2
3	Close	new\food\kissh.jpg	5	1.55792	5
3	Close	new\food\chocolateice.jpg	8	1.23436	3
3	Close	new\food\strawberry.jpg	9	1.03246	5
3	Close	new\food\steak.jpg	5	0.873887	2
3	Close	new\food\past.jpg	4	1.6007	4
3	Close	new\food\hamburger.jpg	8	2.38334	4
3	Close	new\food\strawberry.jpg	9	3.58327	5
3	Close	new\food\steak.jpg	4	0.890998	5
3	Close	new\food\donut.jpg	8	1.19991	3
3	Close	new\food\chocolatecake.jpg	8	1.94204	4
3	Close	new\food\macaroni.jpg	5	1.61679	5
3	Close	new\food\tomato.jpg	5	1.93222	4
3	Close	new\food\croissant.jpg	8	1.34906	3
3	Close	new\food\macaroni.jpg	4	0.916204	4
3	Close	new\food\chocolatecake.jpg	8	1.15821	5
3	Close	new\food\past.jpg	4	0.983939	5
3	Close	new\food\parfait.jpg	8	1.03382	3
3	Close	new\food\pie.jpg	8	2.14216	4
3	Close	new\food\pie.jpg	8	1.71839	5
3	Close	new\food\pizza.jpg	5	2.19203	5
3	Close	new\food\cherry.jpg	9	1.58403	4
4	Open	new\food\orange.jpg	3	1.14188	4
4	Open	new\food\parfait.jpg	3	0.966904	4
4	Open	new\food\tomato.jpg	8	1.5359	4
4	Open	new\food\chocolatecake.jpg	9	0.789858	5
4	Open	new\food\pancake.jpg	6	1.83177	4
4	Open	new\food\croissant.jpg	6	1.59172	3
4	Open	new\food\pancake.jpg	5	1.33615	4
4	Open	new\food\chocolateice.jpg	9	0.565688	5
4	Open	new\food\donut.jpg	9	0.902654	5
4	Open	new\food\strawberry.jpg	6	1.68584	4
4	Open	new\food\macaroni.jpg	7	0.948034	3
4	Open	new\food\kissh.jpg	9	0.706316	4
4	Open	new\food\chocolateice.jpg	9	0.751677	5
4	Open	new\food\donut.jpg	9	0.587577	6
4	Open	new\food\shushimaki.jpg	2	1.10003	3
4	Open	new\food\parfait.jpg	3	1.56536	4
4	Open	new\food\macaroni.jpg	6	1.57536	5
4	Open	new\food\cherry.jpg	2	0.649052	5
4	Open	new\food\shushi.jpg	4	2.03415	6
4	Open	new\food\shushi.jpg	7	2.35274	3
4	Open	new\food\hamburger.jpg	4	1.88164	4
4	Open	new\food\pizza.jpg	9	0.890656	3
4	Open	new\food\past.jpg	2	1.33288	4
4	Open	new\food\shushimaki.jpg	2	1.03368	2
4	Open	new\food\pie.jpg	9	1.80698	3
4	Open	new\food\hamburger.jpg	8	2.06936	3
4	Open	new\food\chocolatecake.jpg	9	0.923888	4
4	Open	new\food\croissant.jpg	7	3.41957	5
4	Open	new\food\ice.jpg	5	1.65081	4
4	Open	new\food\steak.jpg	5	1.82251	3
4	Open	new\food\kissh.jpg	8	1.12322	5
4	Open	new\food\strawberry.jpg	6	1.65267	3
4	Open	new\food\tomato.jpg	6	1.85833	4
4	Open	new\food\cherry.jpg	2	0.899109	3
4	Open	new\food\steak.jpg	3	1.25439	2
4	Open	new\food\ice.jpg	8	1.70034	3
4	Open	new\food\past.jpg	3	1.21587	3
4	Open	new\food\pizza.jpg	9	0.990936	4
4	Open	new\food\pie.jpg	6	1.90785	5
4	Open	new\food\orange.jpg	3	1.6314	4
4	Close	new\food\shushimaki.jpg	2	1.18388	4
4	Close	new\food\kissh.jpg	9	1.77303	5
4	Close	new\food\tomato.jpg	3	1.36914	4
4	Close	new\food\parfait.jpg	4	1.21682	4
4	Close	new\food\chocolateice.jpg	9	0.898405	4
4	Close	new\food\shushi.jpg	7	1.83173	5
4	Close	new\food\pancake.jpg	6	1.1653	6
4	Close	new\food\pancake.jpg	4	1.4989	4
4	Close	new\food\donut.jpg	9	0.898603	4
4	Close	new\food\croissant.jpg	6	2.33163	2
4	Close	new\food\hamburger.jpg	9	0.66502	2
4	Close	new\food\pizza.jpg	9	1.00797	2
4	Close	new\food\orange.jpg	4	0.93576	5
4	Close	new\food\orange.jpg	5	1.38555	6
4	Close	new\food\ice.jpg	9	0.767115	6
4	Close	new\food\ice.jpg	7	0.767049	5
4	Close	new\food\shushi.jpg	7	1.63163	4
4	Close	new\food\cherry.jpg	2	0.883056	3
4	Close	new\food\shushimaki.jpg	2	0.8175	4
4	Close	new\food\kissh.jpg	9	0.823707	5
4	Close	new\food\chocolateice.jpg	9	0.716113	4
4	Close	new\food\strawberry.jpg	3	0.915076	5
4	Close	new\food\steak.jpg	2	0.87313	5
4	Close	new\food\past.jpg	3	1.3988	6
4	Close	new\food\hamburger.jpg	6	1.32522	4
4	Close	new\food\strawberry.jpg	7	1.2359	2
4	Close	new\food\steak.jpg	4	1.09019	2
4	Close	new\food\donut.jpg	9	0.564942	2
4	Close	new\food\chocolatecake.jpg	9	1.02385	2
4	Close	new\food\macaroni.jpg	8	1.49824	4
4	Close	new\food\tomato.jpg	8	1.20822	3
4	Close	new\food\croissant.jpg	7	0.998127	4
4	Close	new\food\macaroni.jpg	9	2.44874	4
4	Close	new\food\chocolatecake.jpg	9	0.907755	4
4	Close	new\food\past.jpg	3	1.0991	5
4	Close	new\food\parfait.jpg	3	1.40051	6
4	Close	new\food\pie.jpg	7	2.02466	2
4	Close	new\food\pie.jpg	6	1.25827	4
4	Close	new\food\pizza.jpg	9	0.808162	5
4	Close	new\food\cherry.jpg	2	1.13194	3
5	Open	new\food\orange.jpg	9	0.798656	4
5	Open	new\food\parfait.jpg	9	1.16701	4
5	Open	new\food\tomato.jpg	9	1.10888	5
5	Open	new\food\chocolatecake.jpg	9	1.22463	4
5	Open	new\food\pancake.jpg	8	3.63162	3
5	Open	new\food\croissant.jpg	9	2.45993	4
5	Open	new\food\pancake.jpg	9	1.83364	5
5	Open	new\food\chocolateice.jpg	8	2.6004	5
5	Open	new\food\donut.jpg	9	1.23251	4
5	Open	new\food\strawberry.jpg	8	2.19929	3
5	Open	new\food\macaroni.jpg	9	0.882443	4
5	Open	new\food\kissh.jpg	9	1.80851	5
5	Open	new\food\chocolateice.jpg	1	1.20029	6
5	Open	new\food\donut.jpg	9	3.45018	3
5	Open	new\food\shushimaki.jpg	5	2.08397	4
5	Open	new\food\parfait.jpg	9	0.966462	5
5	Open	new\food\macaroni.jpg	9	1.77409	5
5	Open	new\food\cherry.jpg	9	1.53401	6
5	Open	new\food\shushi.jpg	9	1.04921	3
5	Open	new\food\shushi.jpg	9	1.84949	4
5	Open	new\food\hamburger.jpg	9	1.54921	3
5	Open	new\food\pizza.jpg	8	1.25834	4
5	Open	new\food\past.jpg	8	2.5167	2
5	Open	new\food\shushimaki.jpg	7	1.95086	3
5	Open	new\food\pie.jpg	9	1.1082	3
5	Open	new\food\hamburger.jpg	9	0.999067	2
5	Open	new\food\chocolatecake.jpg	9	1.14067	5
5	Open	new\food\croissant.jpg	9	2.31551	4
5	Open	new\food\ice.jpg	9	2.05024	3
5	Open	new\food\steak.jpg	9	1.12392	5
5	Open	new\food\kissh.jpg	9	1.70694	3
5	Open	new\food\strawberry.jpg	9	3.02592	4
5	Open	new\food\tomato.jpg	9	1.44898	3
5	Open	new\food\cherry.jpg	9	1.68343	2
5	Open	new\food\steak.jpg	9	3.34145	3
5	Open	new\food\ice.jpg	9	1.85095	3
5	Open	new\food\past.jpg	9	1.64983	4
5	Open	new\food\pizza.jpg	8	1.94174	5
5	Open	new\food\pie.jpg	9	1.42379	4
5	Open	new\food\orange.jpg	9	1.49838	4
5	Close	new\food\shushimaki.jpg	3	2.88481	5
5	Close	new\food\kissh.jpg	3	2.80837	4
5	Close	new\food\tomato.jpg	4	3.11618	6
5	Close	new\food\parfait.jpg	1	1.43442	6
5	Close	new\food\chocolateice.jpg	1	2.34958	2
5	Close	new\food\shushi.jpg	4	2.51628	2
5	Close	new\food\pancake.jpg	9	2.00074	2
5	Close	new\food\pancake.jpg	4	2.60207	4
5	Close	new\food\donut.jpg	3	2.93299	5
5	Close	new\food\croissant.jpg	3	5.11731	6
5	Close	new\food\hamburger.jpg	7	1.77046	3
5	Close	new\food\pizza.jpg	2	2.02505	5
5	Close	new\food\orange.jpg	1	2.0992	6
5	Close	new\food\orange.jpg	5	3.18339	6
5	Close	new\food\ice.jpg	1	1.4676	5
5	Close	new\food\ice.jpg	1	1.53418	4
5	Close	new\food\shushi.jpg	1	1.59929	3
5	Close	new\food\cherry.jpg	8	4.05119	4
5	Close	new\food\shushimaki.jpg	1	2.11725	5
5	Close	new\food\kissh.jpg	8	2.20732	4
5	Close	new\food\chocolateice.jpg	1	1.48361	5
5	Close	new\food\strawberry.jpg	1	1.51639	5
5	Close	new\food\steak.jpg	9	1.54019	6
5	Close	new\food\past.jpg	8	2.41605	4
5	Close	new\food\hamburger.jpg	1	2.69995	6
5	Close	new\food\strawberry.jpg	1	2.23296	4
5	Close	new\food\steak.jpg	8	2.79124	5
5	Close	new\food\donut.jpg	2	2.36624	6
5	Close	new\food\chocolatecake.jpg	4	1.94137	4
5	Close	new\food\macaroni.jpg	2	2.39927	3
5	Close	new\food\tomato.jpg	3	2.81625	4
5	Close	new\food\croissant.jpg	1	2.54971	4
5	Close	new\food\macaroni.jpg	1	0.949367	4
5	Close	new\food\chocolatecake.jpg	3	2.30871	5
5	Close	new\food\past.jpg	3	1.934	2
5	Close	new\food\parfait.jpg	8	2.00105	3
5	Close	new\food\pie.jpg	4	2.30849	2
5	Close	new\food\pie.jpg	8	2.85875	5
5	Close	new\food\pizza.jpg	2	1.57563	3
5	Close	new\food\cherry.jpg	4	1.96724	4
6	Open	new\food\orange.jpg	5	1.31516	5
6	Open	new\food\parfait.jpg	9	1.05068	2
6	Open	new\food\tomato.jpg	6	0.935385	5
6	Open	new\food\chocolatecake.jpg	8	3.02481	4
6	Open	new\food\pancake.jpg	9	0.667006	3
6	Open	new\food\croissant.jpg	7	1.11557	4
6	Open	new\food\pancake.jpg	9	0.616747	3
6	Open	new\food\chocolateice.jpg	8	1.43304	5
6	Open	new\food\donut.jpg	9	0.749501	3
6	Open	new\food\strawberry.jpg	4	1.16495	4
6	Open	new\food\macaroni.jpg	4	1.23276	5
6	Open	new\food\kissh.jpg	8	1.19081	3
6	Open	new\food\chocolateice.jpg	9	0.767305	2
6	Open	new\food\donut.jpg	6	1.61578	5
6	Open	new\food\shushimaki.jpg	5	1.15071	3
6	Open	new\food\parfait.jpg	8	3.05508	4
6	Open	new\food\macaroni.jpg	5	1.34856	3
6	Open	new\food\cherry.jpg	5	0.900815	5
6	Open	new\food\shushi.jpg	7	2.87599	5
6	Open	new\food\shushi.jpg	5	1.01536	3
6	Open	new\food\hamburger.jpg	5	1.41606	6
6	Open	new\food\pizza.jpg	7	1.22468	2
6	Open	new\food\past.jpg	4	1.5174	2
6	Open	new\food\shushimaki.jpg	6	2.26767	2
6	Open	new\food\pie.jpg	9	1.42512	4
6	Open	new\food\hamburger.jpg	9	0.948987	4
6	Open	new\food\chocolatecake.jpg	9	1.20799	4
6	Open	new\food\croissant.jpg	9	1.18216	4
6	Open	new\food\ice.jpg	9	0.900807	5
6	Open	new\food\steak.jpg	8	1.35713	4
6	Open	new\food\kissh.jpg	8	1.89088	4
6	Open	new\food\strawberry.jpg	4	1.1821	4
6	Open	new\food\tomato.jpg	5	3.69266	3
6	Open	new\food\cherry.jpg	5	1.21721	5
6	Open	new\food\steak.jpg	8	1.29084	5
6	Open	new\food\ice.jpg	9	1.28369	5
6	Open	new\food\past.jpg	7	1.01727	3
6	Open	new\food\pizza.jpg	9	1.25821	4
6	Open	new\food\pie.jpg	9	1.64162	3
6	Open	new\food\orange.jpg	4	1.24862	4
6	Close	new\food\shushimaki.jpg	5	1.06739	5
6	Close	new\food\kissh.jpg	7	1.52454	3
6	Close	new\food\tomato.jpg	5	1.26558	2
6	Close	new\food\parfait.jpg	9	0.850808	3
6	Close	new\food\chocolateice.jpg	9	0.800655	3
6	Close	new\food\shushi.jpg	5	2.73312	3
6	Close	new\food\pancake.jpg	9	0.733396	3
6	Close	new\food\pancake.jpg	9	1.93185	3
6	Close	new\food\donut.jpg	9	1.38323	5
6	Close	new\food\croissant.jpg	9	0.949321	4
6	Close	new\food\hamburger.jpg	7	0.999776	5
6	Close	new\food\pizza.jpg	7	2.12526	5
6	Close	new\food\orange.jpg	7	1.33272	3
6	Close	new\food\orange.jpg	6	1.39919	5
6	Close	new\food\ice.jpg	9	0.950736	5
6	Close	new\food\ice.jpg	9	1.01734	5
6	Close	new\food\shushi.jpg	4	1.34957	3
6	Close	new\food\cherry.jpg	6	4.38435	5
6	Close	new\food\shushimaki.jpg	4	1.38447	3
6	Close	new\food\kissh.jpg	8	1.77446	5
6	Close	new\food\chocolateice.jpg	9	0.450406	3
6	Close	new\food\strawberry.jpg	6	1.4325	4
6	Close	new\food\steak.jpg	8	1.09112	3
6	Close	new\food\past.jpg	9	1.13385	5
6	Close	new\food\hamburger.jpg	7	1.18318	5
6	Close	new\food\strawberry.jpg	5	1.74971	3
6	Close	new\food\steak.jpg	7	1.80787	2
6	Close	new\food\donut.jpg	9	1.26643	5
6	Close	new\food\chocolatecake.jpg	9	2.09206	4
6	Close	new\food\macaroni.jpg	4	1.48329	3
6	Close	new\food\tomato.jpg	7	1.38278	3
6	Close	new\food\croissant.jpg	8	1.38941	4
6	Close	new\food\macaroni.jpg	4	0.84973	5
6	Close	new\food\chocolatecake.jpg	9	2.27523	4
6	Close	new\food\past.jpg	7	1.69995	5
6	Close	new\food\parfait.jpg	8	0.95082	2
6	Close	new\food\pie.jpg	7	1.0086	2
6	Close	new\food\pie.jpg	8	1.29113	3
6	Close	new\food\pizza.jpg	8	1.97527	2
6	Close	new\food\cherry.jpg	5	1.1841	5
7	Open	new\food\orange.jpg	4	1.40878	5
7	Open	new\food\parfait.jpg	5	1.8165	3
7	Open	new\food\tomato.jpg	7	1.32467	4
7	Open	new\food\chocolatecake.jpg	3	1.40735	5
7	Open	new\food\pancake.jpg	5	1.09919	3
7	Open	new\food\croissant.jpg	4	0.848208	4
7	Open	new\food\pancake.jpg	2	3.3195	5
7	Open	new\food\chocolateice.jpg	5	1.21666	5
7	Open	new\food\donut.jpg	2	1.60232	5
7	Open	new\food\strawberry.jpg	4	1.13242	4
7	Open	new\food\macaroni.jpg	8	1.24862	4
7	Open	new\food\kissh.jpg	9	0.640383	5
7	Open	new\food\chocolateice.jpg	4	1.13352	4
7	Open	new\food\donut.jpg	4	2.16518	2
7	Open	new\food\shushimaki.jpg	2	2.11864	4
7	Open	new\food\parfait.jpg	5	1.61682	5
7	Open	new\food\macaroni.jpg	7	1.64197	4
7	Open	new\food\cherry.jpg	3	1.4984	5
7	Open	new\food\shushi.jpg	2	1.61495	5
7	Open	new\food\shushi.jpg	1	1.15224	5
7	Open	new\food\hamburger.jpg	5	1.69845	5
7	Open	new\food\pizza.jpg	7	0.70722	4
7	Open	new\food\past.jpg	8	0.549593	3
7	Open	new\food\shushimaki.jpg	1	2.2168	4
7	Open	new\food\pie.jpg	8	1.85223	5
7	Open	new\food\hamburger.jpg	4	1.39849	4
7	Open	new\food\chocolatecake.jpg	4	2.60744	3
7	Open	new\food\croissant.jpg	3	1.43161	3
7	Open	new\food\ice.jpg	8	0.71661	4
7	Open	new\food\steak.jpg	5	1.4068	5
7	Open	new\food\kissh.jpg	8	0.65715	4
7	Open	new\food\strawberry.jpg	6	1.71463	4
7	Open	new\food\tomato.jpg	8	2.27536	3
7	Open	new\food\cherry.jpg	3	1.75013	4
7	Open	new\food\steak.jpg	7	2.27405	5
7	Open	new\food\ice.jpg	7	1.88335	3
7	Open	new\food\past.jpg	6	2.58177	5
7	Open	new\food\pizza.jpg	5	1.12395	5
7	Open	new\food\pie.jpg	8	2.10764	3
7	Open	new\food\orange.jpg	8	1.66933	5
7	Close	new\food\shushimaki.jpg	1	0.967394	5
7	Close	new\food\kissh.jpg	8	1.25722	4
7	Close	new\food\tomato.jpg	7	1.48161	4
7	Close	new\food\parfait.jpg	2	0.783287	4
7	Close	new\food\chocolateice.jpg	4	1.6662	3
7	Close	new\food\shushi.jpg	1	1.21907	3
7	Close	new\food\pancake.jpg	2	1.81651	2
7	Close	new\food\pancake.jpg	4	1.38367	3
7	Close	new\food\donut.jpg	3	3.16598	4
7	Close	new\food\croissant.jpg	3	1.33083	5
7	Close	new\food\hamburger.jpg	4	1.38811	3
7	Close	new\food\pizza.jpg	5	1.37437	4
7	Close	new\food\orange.jpg	7	1.34833	2
7	Close	new\food\orange.jpg	3	1.24843	5
7	Close	new\food\ice.jpg	8	0.734052	2
7	Close	new\food\ice.jpg	8	1.06744	2
7	Close	new\food\shushi.jpg	1	1.6923	2
7	Close	new\food\cherry.jpg	3	0.866784	2
7	Close	new\food\shushimaki.jpg	2	1.13421	2
7	Close	new\food\kissh.jpg	7	2.12391	5
7	Close	new\food\chocolateice.jpg	3	2.7495	3
7	Close	new\food\strawberry.jpg	2	1.49856	5
7	Close	new\food\steak.jpg	8	0.640741	2
7	Close	new\food\past.jpg	4	3.26659	4
7	Close	new\food\hamburger.jpg	6	1.39969	4
7	Close	new\food\strawberry.jpg	3	1.41504	5
7	Close	new\food\steak.jpg	5	2.4736	5
7	Close	new\food\donut.jpg	3	1.70808	3
7	Close	new\food\chocolatecake.jpg	3	1.60778	4
7	Close	new\food\macaroni.jpg	8	0.598644	5
7	Close	new\food\tomato.jpg	5	1.31511	4
7	Close	new\food\croissant.jpg	2	1.5355	3
7	Close	new\food\macaroni.jpg	7	1.08192	4
7	Close	new\food\chocolatecake.jpg	2	1.34091	5
7	Close	new\food\past.jpg	8	1.31685	5
7	Close	new\food\parfait.jpg	3	1.44933	3
7	Close	new\food\pie.jpg	7	2.50818	4
7	Close	new\food\pie.jpg	6	3.60812	5
7	Close	new\food\pizza.jpg	2	1.27436	5
7	Close	new\food\cherry.jpg	4	1.63354	4
8	Open	new\food\orange.jpg	1	0.98543	4
8	Open	new\food\parfait.jpg	7	3.98982	4
8	Open	new\food\tomato.jpg	2	1.42336	4
8	Open	new\food\chocolatecake.jpg	8	1.00692	5
8	Open	new\food\pancake.jpg	7	2.0218	4
8	Open	new\food\croissant.jpg	3	0.902358	3
8	Open	new\food\pancake.jpg	8	0.952174	4
8	Open	new\food\chocolateice.jpg	8	1.16565	5
8	Open	new\food\donut.jpg	3	3.93609	5
8	Open	new\food\strawberry.jpg	3	1.40212	4
8	Open	new\food\macaroni.jpg	3	3.53623	3
8	Open	new\food\kissh.jpg	3	0.956137	4
8	Open	new\food\chocolateice.jpg	8	1.23624	5
8	Open	new\food\donut.jpg	3	0.918904	6
8	Open	new\food\shushimaki.jpg	9	0.965082	3
8	Open	new\food\parfait.jpg	6	1.82329	4
8	Open	new\food\macaroni.jpg	3	1.21914	5
8	Open	new\food\cherry.jpg	1	0.864942	5
8	Open	new\food\shushi.jpg	9	1.08772	6
8	Open	new\food\shushi.jpg	9	1.05695	3
8	Open	new\food\hamburger.jpg	5	4.35272	4
8	Open	new\food\pizza.jpg	4	2.60677	3
8	Open	new\food\past.jpg	3	2.42166	4
8	Open	new\food\shushimaki.jpg	8	0.999226	2
8	Open	new\food\pie.jpg	3	2.75162	3
8	Open	new\food\hamburger.jpg	3	3.32178	3
8	Open	new\food\chocolatecake.jpg	8	1.30689	4
8	Open	new\food\croissant.jpg	2	1.1357	5
8	Open	new\food\ice.jpg	2	1.23316	4
8	Open	new\food\steak.jpg	2	0.988474	3
8	Open	new\food\kissh.jpg	3	1.20599	5
8	Open	new\food\strawberry.jpg	3	3.17809	3
8	Open	new\food\tomato.jpg	3	0.873925	4
8	Open	new\food\cherry.jpg	1	1.2918	3
8	Open	new\food\steak.jpg	3	1.54711	2
8	Open	new\food\ice.jpg	2	1.14938	3
8	Open	new\food\past.jpg	3	1.13863	3
8	Open	new\food\pizza.jpg	5	6.20799	4
8	Open	new\food\pie.jpg	2	1.40509	5
8	Open	new\food\orange.jpg	3	5.61277	4
8	Close	new\food\shushimaki.jpg	9	2.52523	4
8	Close	new\food\kissh.jpg			5
8	Close	new\food\tomato.jpg	3	3.4592	4
8	Close	new\food\parfait.jpg	8	1.09881	4
8	Close	new\food\chocolateice.jpg	6	1.68299	4
8	Close	new\food\shushi.jpg	9	1.31978	2
8	Close	new\food\pancake.jpg	8	2.1361	2
8	Close	new\food\pancake.jpg	8	1.11875	4
8	Close	new\food\donut.jpg	3	3.21941	4
8	Close	new\food\croissant.jpg	3	1.58364	2
8	Close	new\food\hamburger.jpg	3	1.0856	2
8	Close	new\food\pizza.jpg	5	8.69203	2
8	Close	new\food\orange.jpg	2	0.869019	5
8	Close	new\food\orange.jpg	1	2.14092	2
8	Close	new\food\ice.jpg	2	3.11473	3
8	Close	new\food\ice.jpg	2	0.883017	5
8	Close	new\food\shushi.jpg	9	1.22004	4
8	Close	new\food\cherry.jpg	1	0.715549	3
8	Close	new\food\shushimaki.jpg	9	2.53313	4
8	Close	new\food\kissh.jpg	3	1.05572	5
8	Close	new\food\chocolateice.jpg	7	1.64927	4
8	Close	new\food\strawberry.jpg	3	6.28649	5
8	Close	new\food\steak.jpg	3	1.39134	5
8	Close	new\food\past.jpg	3	8.61581	6
8	Close	new\food\hamburger.jpg	5	8.05165	4
8	Close	new\food\strawberry.jpg	3	1.18549	2
8	Close	new\food\steak.jpg	2	0.840063	2
8	Close	new\food\donut.jpg	3	1.01285	2
8	Close	new\food\chocolatecake.jpg	8	1.63823	2
8	Close	new\food\macaroni.jpg	4	5.47284	4
8	Close	new\food\tomato.jpg	3	2.13995	3
8	Close	new\food\croissant.jpg	2	0.938803	4
8	Close	new\food\macaroni.jpg	3	5.15302	4
8	Close	new\food\chocolatecake.jpg	6	1.09063	4
8	Close	new\food\past.jpg	3	0.985433	5
8	Close	new\food\parfait.jpg	5	3.28762	6
8	Close	new\food\pie.jpg	2	0.940773	2
8	Close	new\food\pie.jpg	2	1.04047	4
8	Close	new\food\pizza.jpg	4	1.10766	5
8	Close	new\food\cherry.jpg	1	1.0184	3
9	Open	new\food\orange.jpg	6	2.15275	3
9	Open	new\food\parfait.jpg	7	3.69984	4
9	Open	new\food\tomato.jpg	7	1.39124	5
9	Open	new\food\chocolatecake.jpg	9	0.974495	5
9	Open	new\food\pancake.jpg	3	2.23609	3
9	Open	new\food\croissant.jpg	6	3.34191	4
9	Open	new\food\pancake.jpg	4	1.86955	5
9	Open	new\food\chocolateice.jpg	7	2.66741	3
9	Open	new\food\donut.jpg	4	1.86929	4
9	Open	new\food\strawberry.jpg	5	1.98253	5
9	Open	new\food\macaroni.jpg	5	1.26926	5
9	Open	new\food\kissh.jpg	8	1.17325	5
9	Open	new\food\chocolateice.jpg	6	1.81601	4
9	Open	new\food\donut.jpg	7	3.61969	4
9	Open	new\food\shushimaki.jpg	5	2.93506	5
9	Open	new\food\parfait.jpg	6	1.98308	4
9	Open	new\food\macaroni.jpg	7	1.81968	2
9	Open	new\food\cherry.jpg	8	0.932087	4
9	Open	new\food\shushi.jpg	8	3.04135	5
9	Open	new\food\shushi.jpg	8	1.53605	4
9	Open	new\food\hamburger.jpg	7	1.30262	5
9	Open	new\food\pizza.jpg	9	3.90714	5
9	Open	new\food\past.jpg	5	4.87596	5
9	Open	new\food\shushimaki.jpg	6	1.50062	5
9	Open	new\food\pie.jpg	8	1.02501	4
9	Open	new\food\hamburger.jpg	7	2.61968	3
9	Open	new\food\chocolatecake.jpg	8	1.60786	4
9	Open	new\food\croissant.jpg	6	1.20852	5
9	Open	new\food\ice.jpg	6	1.43368	4
9	Open	new\food\steak.jpg	6	1.83857	3
9	Open	new\food\kissh.jpg	5	2.5567	3
9	Open	new\food\strawberry.jpg	2	4.25916	4
9	Open	new\food\tomato.jpg	7	2.15853	5
9	Open	new\food\cherry.jpg	6	2.46737	4
9	Open	new\food\steak.jpg	7	2.67326	4
9	Open	new\food\ice.jpg	5	1.36708	3
9	Open	new\food\past.jpg	6	1.28201	4
9	Open	new\food\pizza.jpg	6	3.77875	5
9	Open	new\food\pie.jpg	9	1.57441	3
9	Open	new\food\orange.jpg	6	2.136	5
9	Close	new\food\shushimaki.jpg	6	3.88461	5
9	Close	new\food\kissh.jpg	4	2.60674	3
9	Close	new\food\tomato.jpg	4	3.49148	5
9	Close	new\food\parfait.jpg	6	3.03377	5
9	Close	new\food\chocolateice.jpg	7	0.832397	4
9	Close	new\food\shushi.jpg	8	2.24851	4
9	Close	new\food\pancake.jpg	4	2.01555	4
9	Close	new\food\pancake.jpg	5	2.56625	3
9	Close	new\food\donut.jpg	4	1.69807	3
9	Close	new\food\croissant.jpg	6	1.15264	2
9	Close	new\food\hamburger.jpg	5	1.71947	3
9	Close	new\food\pizza.jpg	6	1.52469	2
9	Close	new\food\orange.jpg	4	1.54896	2
9	Close	new\food\orange.jpg	6	2.80312	2
9	Close	new\food\ice.jpg	5	3.30082	2
9	Close	new\food\ice.jpg	7	1.83413	5
9	Close	new\food\shushi.jpg	7	2.48328	5
9	Close	new\food\cherry.jpg	8	1.63254	4
9	Close	new\food\shushimaki.jpg	5	1.78409	4
9	Close	new\food\kissh.jpg	6	1.13888	3
9	Close	new\food\chocolateice.jpg	4	3.84809	4
9	Close	new\food\strawberry.jpg	4	2.40346	2
9	Close	new\food\steak.jpg	7	1.52316	5
9	Close	new\food\past.jpg	5	1.33203	3
9	Close	new\food\hamburger.jpg	5	1.66508	5
9	Close	new\food\strawberry.jpg	6	1.60288	5
9	Close	new\food\steak.jpg	7	1.80658	4
9	Close	new\food\donut.jpg	4	1.76937	4
9	Close	new\food\chocolatecake.jpg	6	2.67558	5
9	Close	new\food\macaroni.jpg	5	5.56586	5
9	Close	new\food\tomato.jpg	8	1.78563	3
9	Close	new\food\croissant.jpg	7	2.31619	4
9	Close	new\food\macaroni.jpg	6	4.33644	5
9	Close	new\food\chocolatecake.jpg	9	1.00721	4
9	Close	new\food\past.jpg	5	1.19902	3
9	Close	new\food\parfait.jpg	7	4.68463	4
9	Close	new\food\pie.jpg	8	2.00824	5
9	Close	new\food\pie.jpg	8	1.92357	5
9	Close	new\food\pizza.jpg	7	3.19261	3
9	Close	new\food\cherry.jpg	7	3.01565	4
10	Open	new\food\orange.jpg	7	1.0652	5
10	Open	new\food\parfait.jpg	8	1.33423	5
10	Open	new\food\tomato.jpg	8	1.58226	4
10	Open	new\food\chocolatecake.jpg	8	1.09108	4
10	Open	new\food\pancake.jpg	7	1.26688	4
10	Open	new\food\croissant.jpg	7	1.73233	4
10	Open	new\food\pancake.jpg	3	0.848849	5
10	Open	new\food\chocolateice.jpg	5	1.08408	4
10	Open	new\food\donut.jpg	7	0.849536	3
10	Open	new\food\strawberry.jpg	4	0.982611	4
10	Open	new\food\macaroni.jpg	8	0.932402	5
10	Open	new\food\kissh.jpg	7	1.29036	5
10	Open	new\food\chocolateice.jpg	5	1.94944	4
10	Open	new\food\donut.jpg	6	1.04935	3
10	Open	new\food\shushimaki.jpg	3	0.984119	4
10	Open	new\food\parfait.jpg	8	1.11718	5
10	Open	new\food\macaroni.jpg	9	1.09855	6
10	Open	new\food\cherry.jpg	8	1.01722	3
10	Open	new\food\shushi.jpg	5	1.59144	4
10	Open	new\food\shushi.jpg	4	0.898881	5
10	Open	new\food\hamburger.jpg	7	1.2162	5
10	Open	new\food\pizza.jpg	7	1.55769	6
10	Open	new\food\past.jpg	7	1.46575	3
10	Open	new\food\shushimaki.jpg	6	1.01756	4
10	Open	new\food\pie.jpg	3	0.758141	3
10	Open	new\food\hamburger.jpg	7	0.733033	4
10	Open	new\food\chocolatecake.jpg	7	1.67485	2
10	Open	new\food\croissant.jpg	4	0.892189	3
10	Open	new\food\ice.jpg	7	0.934105	3
10	Open	new\food\steak.jpg	8	1.27385	4
10	Open	new\food\kissh.jpg	4	0.724078	5
10	Open	new\food\strawberry.jpg	8	0.398986	4
10	Open	new\food\tomato.jpg	3	1.03192	3
10	Open	new\food\cherry.jpg	5	2.66648	5
10	Open	new\food\steak.jpg	7	2.00719	3
10	Open	new\food\ice.jpg	7	1.18381	4
10	Open	new\food\past.jpg	8	0.634022	3
10	Open	new\food\pizza.jpg	7	0.708127	2
10	Open	new\food\pie.jpg	7	0.958365	3
10	Open	new\food\orange.jpg	5	1.28204	3
10	Close	new\food\shushimaki.jpg	3	1.71713	4
10	Close	new\food\kissh.jpg	4	0.457878	5
10	Close	new\food\tomato.jpg	4	0.799413	4
10	Close	new\food\parfait.jpg	4	2.0344	4
10	Close	new\food\chocolateice.jpg	3	0.850644	5
10	Close	new\food\shushi.jpg	4	1.0996	4
10	Close	new\food\pancake.jpg	3	0.687993	4
10	Close	new\food\pancake.jpg	3	0.735259	4
10	Close	new\food\donut.jpg	8	0.666377	5
10	Close	new\food\croissant.jpg	3	3.94992	6
10	Close	new\food\hamburger.jpg	4	0.748891	4
10	Close	new\food\pizza.jpg	5	1.2418	4
10	Close	new\food\orange.jpg	4	1.08214	5
10	Close	new\food\orange.jpg	3	1.39899	6
10	Close	new\food\ice.jpg	7	1.23377	2
10	Close	new\food\ice.jpg	3	2.20107	2
10	Close	new\food\shushi.jpg	3	0.94919	2
10	Close	new\food\cherry.jpg	3	1.10106	6
10	Close	new\food\shushimaki.jpg	3	3.41786	5
10	Close	new\food\kissh.jpg	7	0.357653	4
10	Close	new\food\chocolateice.jpg	4	0.900975	3
10	Close	new\food\strawberry.jpg	3	0.965893	4
10	Close	new\food\steak.jpg	4	0.974811	5
10	Close	new\food\past.jpg	6	7.12083	4
10	Close	new\food\hamburger.jpg	3	3.21699	5
10	Close	new\food\strawberry.jpg	3	0.898759	5
10	Close	new\food\steak.jpg	8	3.22541	6
10	Close	new\food\donut.jpg	4	0.699998	4
10	Close	new\food\chocolatecake.jpg	7	0.558343	6
10	Close	new\food\macaroni.jpg	8	1.49971	4
10	Close	new\food\tomato.jpg	5	2.09887	5
10	Close	new\food\croissant.jpg	4	0.998962	6
10	Close	new\food\macaroni.jpg	7	1.33206	4
10	Close	new\food\chocolatecake.jpg	8	0.691677	3
10	Close	new\food\past.jpg	4	1.584	4
10	Close	new\food\parfait.jpg	8	1.01727	4
10	Close	new\food\pie.jpg	4	0.624725	4
10	Close	new\food\pie.jpg	3	1.85862	5
10	Close	new\food\pizza.jpg	7	1.07528	6
10	Close	new\food\cherry.jpg	4	0.784098	2
11	Open	new\food\orange.jpg	4	2.03201	4
11	Open	new\food\parfait.jpg	7	1.5174	5
11	Open	new\food\tomato.jpg	4	0.931745	3
11	Open	new\food\chocolatecake.jpg	5	1.39124	4
11	Open	new\food\pancake.jpg	4	1.71548	5
11	Open	new\food\croissant.jpg	8	1.24876	2
11	Open	new\food\pancake.jpg	5	0.847634	5
11	Open	new\food\chocolateice.jpg	4	1.70071	4
11	Open	new\food\donut.jpg	4	0.915883	3
11	Open	new\food\strawberry.jpg	3	1.21565	4
11	Open	new\food\macaroni.jpg	3	0.78261	3
11	Open	new\food\kissh.jpg	5	1.20603	5
11	Open	new\food\chocolateice.jpg	3	0.966335	3
11	Open	new\food\donut.jpg	4	1.33275	4
11	Open	new\food\shushimaki.jpg	3	2.22217	5
11	Open	new\food\parfait.jpg	6	2.15072	3
11	Open	new\food\macaroni.jpg	3	1.23228	2
11	Open	new\food\cherry.jpg	3	1.06727	5
11	Open	new\food\shushi.jpg	8	1.11527	3
11	Open	new\food\shushi.jpg	8	0.982375	4
11	Open	new\food\hamburger.jpg	6	1.38281	3
11	Open	new\food\pizza.jpg	8	1.00824	5
11	Open	new\food\past.jpg	5	1.45045	5
11	Open	new\food\shushimaki.jpg	4	2.31788	3
11	Open	new\food\pie.jpg	8	0.824715	6
11	Open	new\food\hamburger.jpg	8	0.782658	6
11	Open	new\food\chocolatecake.jpg	8	0.940042	4
11	Open	new\food\croissant.jpg	8	0.823785	4
11	Open	new\food\ice.jpg	4	1.61764	4
11	Open	new\food\steak.jpg	6	1.4576	4
11	Open	new\food\kissh.jpg	5	1.16881	4
11	Open	new\food\strawberry.jpg	3	0.968712	4
11	Open	new\food\tomato.jpg	4	1.88182	5
11	Open	new\food\cherry.jpg	2	1.10061	4
11	Open	new\food\steak.jpg	4	2.79039	4
11	Open	new\food\ice.jpg	4	1.3343	4
11	Open	new\food\past.jpg	5	1.20049	3
11	Open	new\food\pizza.jpg	7	1.25388	5
11	Open	new\food\pie.jpg	8	1.02477	5
11	Open	new\food\orange.jpg	6	1.09888	5
11	Close	new\food\shushimaki.jpg	2	1.11741	3
11	Close	new\food\kissh.jpg	5	1.64134	4
11	Close	new\food\tomato.jpg	3	1.71536	3
11	Close	new\food\parfait.jpg	4	3.06776	4
11	Close	new\food\chocolateice.jpg	4	1.80062	5
11	Close	new\food\shushi.jpg	7	1.08273	3
11	Close	new\food\pancake.jpg	4	1.20002	4
11	Close	new\food\pancake.jpg	3	0.966951	4
11	Close	new\food\donut.jpg	3	1.06502	5
11	Close	new\food\croissant.jpg	8	0.865641	5
11	Close	new\food\hamburger.jpg	9	1.61507	5
11	Close	new\food\pizza.jpg	7	1.50821	5
11	Close	new\food\orange.jpg	7	1.74929	5
11	Close	new\food\orange.jpg	5	1.78225	4
11	Close	new\food\ice.jpg	3	1.05128	5
11	Close	new\food\ice.jpg	6	1.31739	2
11	Close	new\food\shushi.jpg	8	1.26547	2
11	Close	new\food\cherry.jpg	3	0.967417	2
11	Close	new\food\shushimaki.jpg	3	0.86719	2
11	Close	new\food\kissh.jpg	2	1.37391	2
11	Close	new\food\chocolateice.jpg	7	2.36728	4
11	Close	new\food\strawberry.jpg	6	1.36578	5
11	Close	new\food\steak.jpg	6	1.40886	3
11	Close	new\food\past.jpg	5	0.916944	5
11	Close	new\food\hamburger.jpg	8	0.99921	3
11	Close	new\food\strawberry.jpg	4	0.883157	4
11	Close	new\food\steak.jpg	4	1.77449	4
11	Close	new\food\donut.jpg	3	0.916322	5
11	Close	new\food\chocolatecake.jpg	8	0.891568	5
11	Close	new\food\macaroni.jpg	6	1.28306	6
11	Close	new\food\tomato.jpg	4	2.0489	5
11	Close	new\food\croissant.jpg	8	1.10353	5
11	Close	new\food\macaroni.jpg	6	1.78167	4
11	Close	new\food\chocolatecake.jpg	8	1.04158	3
11	Close	new\food\past.jpg	4	1.04948	3
11	Close	new\food\parfait.jpg	4	1.95086	4
11	Close	new\food\pie.jpg	8	1.05673	5
11	Close	new\food\pie.jpg	7	1.6923	4
11	Close	new\food\pizza.jpg	7	1.05778	5
11	Close	new\food\cherry.jpg	3	1.39993	4
12	Open	new\food\orange.jpg	8	0.669014	5
12	Open	new\food\parfait.jpg	1	0.69857	3
12	Open	new\food\tomato.jpg	1	0.757904	4
12	Open	new\food\chocolatecake.jpg	1	0.757102	5
12	Open	new\food\pancake.jpg	9	0.58587	5
12	Open	new\food\croissant.jpg	1	0.602523	3
12	Open	new\food\pancake.jpg	9	0.547989	2
12	Open	new\food\chocolateice.jpg	2	0.76509	5
12	Open	new\food\donut.jpg	9	0.635942	3
12	Open	new\food\strawberry.jpg	1	0.769212	4
12	Open	new\food\macaroni.jpg	7	1.04824	5
12	Open	new\food\kissh.jpg	9	0.589668	5
12	Open	new\food\chocolateice.jpg	2	0.615737	5
12	Open	new\food\donut.jpg	9	0.752444	4
12	Open	new\food\shushimaki.jpg	9	0.583411	4
12	Open	new\food\parfait.jpg	1	0.782894	5
12	Open	new\food\macaroni.jpg	8	0.719092	4
12	Open	new\food\cherry.jpg	1	0.632165	2
12	Open	new\food\shushi.jpg	9	0.552557	4
12	Open	new\food\shushi.jpg	9	1.28582	5
12	Open	new\food\hamburger.jpg	9	0.50252	4
12	Open	new\food\pizza.jpg	9	0.72399	5
12	Open	new\food\past.jpg	9	0.881804	5
12	Open	new\food\shushimaki.jpg	8	0.717273	5
12	Open	new\food\pie.jpg	1	0.857574	5
12	Open	new\food\hamburger.jpg	9	0.65784	4
12	Open	new\food\chocolatecake.jpg	8	0.657263	3
12	Open	new\food\croissant.jpg	9	0.641303	4
12	Open	new\food\ice.jpg	8	0.616744	5
12	Open	new\food\steak.jpg	8	0.689785	4
12	Open	new\food\kissh.jpg	8	0.956381	3
12	Open	new\food\strawberry.jpg	1	0.841508	3
12	Open	new\food\tomato.jpg	9	0.724872	4
12	Open	new\food\cherry.jpg	1	0.48221	5
12	Open	new\food\steak.jpg	9	0.772121	4
12	Open	new\food\ice.jpg	8	0.867	4
12	Open	new\food\past.jpg	9	0.615233	3
12	Open	new\food\pizza.jpg	9	0.856999	4
12	Open	new\food\pie.jpg	2	0.823987	5
12	Open	new\food\orange.jpg	8	0.652706	3
12	Close	new\food\shushimaki.jpg	9	0.617889	5
12	Close	new\food\kissh.jpg	9	0.690277	5
12	Close	new\food\tomato.jpg	9	0.752717	3
12	Close	new\food\parfait.jpg	1	0.549914	2
12	Close	new\food\chocolateice.jpg	8	1.13224	5
12	Close	new\food\shushi.jpg	9	0.686088	2
12	Close	new\food\pancake.jpg	9	0.631787	2
12	Close	new\food\pancake.jpg	9	0.698908	2
12	Close	new\food\donut.jpg	9	0.68169	3
12	Close	new\food\croissant.jpg	9	0.49224	3
12	Close	new\food\hamburger.jpg	9	0.631886	2
12	Close	new\food\pizza.jpg	9	0.60882	3
12	Close	new\food\orange.jpg	8	0.602538	4
12	Close	new\food\orange.jpg	9	0.8192	5
12	Close	new\food\ice.jpg	8	0.733721	3
12	Close	new\food\ice.jpg	8	0.683639	4
12	Close	new\food\shushi.jpg	9	0.625292	5
12	Close	new\food\cherry.jpg	1	0.715613	5
12	Close	new\food\shushimaki.jpg	8	0.850457	4
12	Close	new\food\kissh.jpg	7	1.05657	4
12	Close	new\food\chocolateice.jpg	8	0.764904	3
12	Close	new\food\strawberry.jpg	1	0.80264	4
12	Close	new\food\steak.jpg	8	0.853289	2
12	Close	new\food\past.jpg	9	0.651716	5
12	Close	new\food\hamburger.jpg	9	0.715066	3
12	Close	new\food\strawberry.jpg	8	0.664849	5
12	Close	new\food\steak.jpg	9	0.723565	5
12	Close	new\food\donut.jpg	9	0.665454	4
12	Close	new\food\chocolatecake.jpg	9	0.907725	4
12	Close	new\food\macaroni.jpg	7	1.05864	5
12	Close	new\food\tomato.jpg	9	0.841905	5
12	Close	new\food\croissant.jpg	9	0.598302	3
12	Close	new\food\macaroni.jpg	7	0.831843	4
12	Close	new\food\chocolatecake.jpg	8	0.790834	5
12	Close	new\food\past.jpg	9	0.598674	4
12	Close	new\food\parfait.jpg	9	0.616547	3
12	Close	new\food\pie.jpg	9	0.623955	4
12	Close	new\food\pie.jpg	8	0.6745	5
12	Close	new\food\pizza.jpg	9	0.52454	5
12	Close	new\food\cherry.jpg	1	0.697659	3
13	Open	new\food\orange.jpg	7	1.52575	4
13	Open	new\food\parfait.jpg	7	1.83236	5
13	Open	new\food\tomato.jpg	9	1.04605	5
13	Open	new\food\chocolatecake.jpg	5	1.50818	4
13	Open	new\food\pancake.jpg	3	1.34399	4
13	Open	new\food\croissant.jpg	7	2.36303	4
13	Open	new\food\pancake.jpg	4	0.876685	4
13	Open	new\food\chocolateice.jpg	7	1.1835	4
13	Open	new\food\donut.jpg	2	1.09968	4
13	Open	new\food\strawberry.jpg	8	1.17598	2
13	Open	new\food\macaroni.jpg	7	1.17823	2
13	Open	new\food\kissh.jpg	7	1.34067	3
13	Open	new\food\chocolateice.jpg	8	1.16696	4
13	Open	new\food\donut.jpg	4	0.909185	4
13	Open	new\food\shushimaki.jpg	2	0.917708	4
13	Open	new\food\parfait.jpg	8	1.3338	3
13	Open	new\food\macaroni.jpg	7	1.64056	4
13	Open	new\food\cherry.jpg	4	2.70023	5
13	Open	new\food\shushi.jpg	5	0.892821	6
13	Open	new\food\shushi.jpg	7	1.10949	3
13	Open	new\food\hamburger.jpg	8	0.959592	4
13	Open	new\food\pizza.jpg	8	1.44162	5
13	Open	new\food\past.jpg	3	1.23434	5
13	Open	new\food\shushimaki.jpg	2	1.00085	6
13	Open	new\food\pie.jpg	2	1.24124	3
13	Open	new\food\hamburger.jpg	8	1.0986	4
13	Open	new\food\chocolatecake.jpg	5	1.30122	3
13	Open	new\food\croissant.jpg	5	1.45929	4
13	Open	new\food\ice.jpg	8	0.968715	2
13	Open	new\food\steak.jpg	6	1.60734	3
13	Open	new\food\kissh.jpg	7	1.54057	3
13	Open	new\food\strawberry.jpg	2	1.09602	4
13	Open	new\food\tomato.jpg	9	1.00891	5
13	Open	new\food\cherry.jpg	3	0.799913	4
13	Open	new\food\steak.jpg	7	1.97576	3
13	Open	new\food\ice.jpg	7	1.13213	5
13	Open	new\food\past.jpg	4	1.40991	3
13	Open	new\food\pizza.jpg	7	1.49873	4
13	Open	new\food\pie.jpg	2	1.14859	2
13	Open	new\food\orange.jpg	7	1.24244	2
13	Close	new\food\shushimaki.jpg	3	0.934342	3
13	Close	new\food\kissh.jpg	6	1.50457	3
13	Close	new\food\tomato.jpg	8	0.892591	4
13	Close	new\food\parfait.jpg	7	1.68386	5
13	Close	new\food\chocolateice.jpg	8	1.27954	4
13	Close	new\food\shushi.jpg	8	1.03132	4
13	Close	new\food\pancake.jpg	5	1.10457	5
13	Close	new\food\pancake.jpg	5	1.01636	4
13	Close	new\food\donut.jpg	3	1.20957	4
13	Close	new\food\croissant.jpg	2	1.09282	4
13	Close	new\food\hamburger.jpg	8	0.876401	2
13	Close	new\food\pizza.jpg	4	1.49195	4
13	Close	new\food\orange.jpg	8	1.3428	3
13	Close	new\food\orange.jpg	4	2.217	2
13	Close	new\food\ice.jpg	8	0.800712	5
13	Close	new\food\ice.jpg	7	1.18418	6
13	Close	new\food\shushi.jpg	7	1.22615	3
13	Close	new\food\cherry.jpg	4	0.816835	5
13	Close	new\food\shushimaki.jpg	3	1.31776	6
13	Close	new\food\kissh.jpg	7	1.99732	6
13	Close	new\food\chocolateice.jpg	7	0.983227	5
13	Close	new\food\strawberry.jpg	8	1.44315	4
13	Close	new\food\steak.jpg	6	2.67309	3
13	Close	new\food\past.jpg	4	1.05003	4
13	Close	new\food\hamburger.jpg	8	1.11105	5
13	Close	new\food\strawberry.jpg	8	0.992941	4
13	Close	new\food\steak.jpg	6	1.62262	5
13	Close	new\food\donut.jpg	3	0.876625	5
13	Close	new\food\chocolatecake.jpg	5	1.69166	6
13	Close	new\food\macaroni.jpg	7	0.92641	4
13	Close	new\food\tomato.jpg	9	1.35932	6
13	Close	new\food\croissant.jpg	5	1.17605	4
13	Close	new\food\macaroni.jpg	7	1.45971	5
13	Close	new\food\chocolatecake.jpg	7	2.05878	6
13	Close	new\food\past.jpg	5	1.28361	4
13	Close	new\food\parfait.jpg	7	1.3348	3
13	Close	new\food\pie.jpg	3	0.84159	4
13	Close	new\food\pie.jpg	2	1.07551	3
13	Close	new\food\pizza.jpg	7	1.30864	4
13	Close	new\food\cherry.jpg	4	1.19324	5
14	Open	new\food\orange.jpg	6	1.04205	6
14	Open	new\food\parfait.jpg	6	1.15007	2
14	Open	new\food\tomato.jpg	7	1.42556	4
14	Open	new\food\chocolatecake.jpg	6	1.09141	5
14	Open	new\food\pancake.jpg	9	0.910599	3
14	Open	new\food\croissant.jpg	5	0.991828	4
14	Open	new\food\pancake.jpg	9	1.20985	5
14	Open	new\food\chocolateice.jpg	7	1.39341	2
14	Open	new\food\donut.jpg	5	0.910162	5
14	Open	new\food\strawberry.jpg	6	1.47162	4
14	Open	new\food\macaroni.jpg	5	1.14283	3
14	Open	new\food\kissh.jpg	5	1.25712	2
14	Open	new\food\chocolateice.jpg	5	1.16642	3
14	Open	new\food\donut.jpg	5	1.20064	5
14	Open	new\food\shushimaki.jpg	4	1.00079	3
14	Open	new\food\parfait.jpg	6	0.70002	4
14	Open	new\food\macaroni.jpg	7	1.00941	5
14	Open	new\food\cherry.jpg	6	1.0328	3
14	Open	new\food\shushi.jpg	9	1.17613	2
14	Open	new\food\shushi.jpg	9	0.959351	5
14	Open	new\food\hamburger.jpg	7	1.2098	3
14	Open	new\food\pizza.jpg	8	1.10812	4
14	Open	new\food\past.jpg	3	1.02631	3
14	Open	new\food\shushimaki.jpg	4	1.26738	5
14	Open	new\food\pie.jpg	9	0.89149	5
14	Open	new\food\hamburger.jpg	7	0.993127	3
14	Open	new\food\chocolatecake.jpg	6	1.05837	6
14	Open	new\food\croissant.jpg	4	0.942533	6
14	Open	new\food\ice.jpg	4	2.35438	4
14	Open	new\food\steak.jpg	4	1.89086	4
14	Open	new\food\kissh.jpg	5	1.25718	4
14	Open	new\food\strawberry.jpg	6	1.226	4
14	Open	new\food\tomato.jpg	8	0.809125	4
14	Open	new\food\cherry.jpg	6	0.916156	4
14	Open	new\food\steak.jpg	4	1.30758	5
14	Open	new\food\ice.jpg	6	1.50115	4
14	Open	new\food\past.jpg	3	1.6433	4
14	Open	new\food\pizza.jpg	8	0.891776	4
14	Open	new\food\pie.jpg	9	0.925071	3
14	Open	new\food\orange.jpg	4	0.942453	3
14	Close	new\food\shushimaki.jpg	4	0.901411	5
14	Close	new\food\kissh.jpg	5	1.10798	5
14	Close	new\food\tomato.jpg	8	0.959518	3
14	Close	new\food\parfait.jpg	6	1.08399	4
14	Close	new\food\chocolateice.jpg	5	1.14973	3
14	Close	new\food\shushi.jpg	7	1.50862	4
14	Close	new\food\pancake.jpg	9	0.982626	5
14	Close	new\food\pancake.jpg	9	0.86643	3
14	Close	new\food\donut.jpg	6	0.95984	4
14	Close	new\food\croissant.jpg	5	1.17637	4
14	Close	new\food\hamburger.jpg	7	0.891597	5
14	Close	new\food\pizza.jpg	8	1.30821	5
14	Close	new\food\orange.jpg	5	1.14309	2
14	Close	new\food\orange.jpg	5	1.24287	2
14	Close	new\food\ice.jpg	5	1.034	2
14	Close	new\food\ice.jpg	4	0.967548	4
14	Close	new\food\shushi.jpg	9	0.991278	5
14	Close	new\food\cherry.jpg	7	1.08312	5
14	Close	new\food\shushimaki.jpg	4	0.91749	4
14	Close	new\food\kissh.jpg	6	1.37472	5
14	Close	new\food\chocolateice.jpg	5	0.983266	5
14	Close	new\food\strawberry.jpg	7	1.17626	5
14	Close	new\food\steak.jpg	4	1.10797	4
14	Close	new\food\past.jpg	3	0.999454	5
14	Close	new\food\hamburger.jpg	7	1.16003	3
14	Close	new\food\strawberry.jpg	6	0.910092	5
14	Close	new\food\steak.jpg	3	1.158	3
14	Close	new\food\donut.jpg	5	1.24265	4
14	Close	new\food\chocolatecake.jpg	7	1.10811	4
14	Close	new\food\macaroni.jpg	7	1.19278	5
14	Close	new\food\tomato.jpg	8	1.026	5
14	Close	new\food\croissant.jpg	5	1.22581	6
14	Close	new\food\macaroni.jpg	6	1.16625	5
14	Close	new\food\chocolatecake.jpg	8	1.64136	2
14	Close	new\food\past.jpg	3	1.26656	2
14	Close	new\food\parfait.jpg	6	1.0499	3
14	Close	new\food\pie.jpg	9	1.22482	3
14	Close	new\food\pie.jpg	9	0.741587	4
14	Close	new\food\pizza.jpg	8	0.908565	5
14	Close	new\food\cherry.jpg	6	1.11636	4
15	Open	new\food\orange.jpg	6	2.55891	5
15	Open	new\food\parfait.jpg	9	1.04324	4
15	Open	new\food\tomato.jpg	8	1.14227	5
15	Open	new\food\chocolatecake.jpg	8	2.09187	3
15	Open	new\food\pancake.jpg	5	1.09378	4
15	Open	new\food\croissant.jpg	7	2.77585	5
15	Open	new\food\pancake.jpg	5	1.52606	5
15	Open	new\food\chocolateice.jpg	8	1.24327	3
15	Open	new\food\donut.jpg	7	1.22649	4
15	Open	new\food\strawberry.jpg	9	0.87637	5
15	Open	new\food\macaroni.jpg	9	1.10978	3
15	Open	new\food\kissh.jpg	9	1.49088	4
15	Open	new\food\chocolateice.jpg	8	1.43343	5
15	Open	new\food\donut.jpg	7	1.24322	5
15	Open	new\food\shushimaki.jpg	4	0.917528	5
15	Open	new\food\parfait.jpg	9	0.983342	4
15	Open	new\food\macaroni.jpg	9	1.32591	4
15	Open	new\food\cherry.jpg	6	1.67296	5
15	Open	new\food\shushi.jpg	5	1.27581	4
15	Open	new\food\shushi.jpg	5	1.05928	2
15	Open	new\food\hamburger.jpg	9	0.976199	4
15	Open	new\food\pizza.jpg	9	0.858222	5
15	Open	new\food\past.jpg	9	0.976927	4
15	Open	new\food\shushimaki.jpg	4	1.11733	5
15	Open	new\food\pie.jpg	6	1.15761	5
15	Open	new\food\hamburger.jpg	9	1.09304	5
15	Open	new\food\chocolatecake.jpg	9	1.09129	5
15	Open	new\food\croissant.jpg	7	1.7095	4
15	Open	new\food\ice.jpg	5	3.30042	3
15	Open	new\food\steak.jpg	8	0.97446	4
15	Open	new\food\kissh.jpg	7	1.30762	5
15	Open	new\food\strawberry.jpg	9	1.05953	4
15	Open	new\food\tomato.jpg	8	1.07595	3
15	Open	new\food\cherry.jpg	7	1.3996	2
15	Open	new\food\steak.jpg	8	1.02419	3
15	Open	new\food\ice.jpg	5	1.05097	5
15	Open	new\food\past.jpg	9	1.14309	4
15	Open	new\food\pizza.jpg	9	1.05702	4
15	Open	new\food\pie.jpg	6	1.10833	3
15	Open	new\food\orange.jpg	5	1.9762	4
15	Close	new\food\shushimaki.jpg	4	0.984144	5
15	Close	new\food\kissh.jpg	7	1.09143	3
15	Close	new\food\tomato.jpg	7	1.34283	5
15	Close	new\food\parfait.jpg	9	1.08358	5
15	Close	new\food\chocolateice.jpg	8	0.899798	3
15	Close	new\food\shushi.jpg	5	2.89346	5
15	Close	new\food\pancake.jpg	5	1.35011	5
15	Close	new\food\pancake.jpg	5	1.44992	4
15	Close	new\food\donut.jpg	6	1.093	4
15	Close	new\food\croissant.jpg	7	1.04297	4
15	Close	new\food\hamburger.jpg	9	1.04363	3
15	Close	new\food\pizza.jpg	9	1.12528	3
15	Close	new\food\orange.jpg	4	1.04278	2
15	Close	new\food\orange.jpg	5	1.44302	3
15	Close	new\food\ice.jpg	5	1.18416	4
15	Close	new\food\ice.jpg	4	1.33354	5
15	Close	new\food\shushi.jpg	5	1.54261	3
15	Close	new\food\cherry.jpg	7	1.31671	4
15	Close	new\food\shushimaki.jpg	4	1.48422	5
15	Close	new\food\kissh.jpg	8	1.1582	5
15	Close	new\food\chocolateice.jpg	8	1.08331	4
15	Close	new\food\strawberry.jpg	9	1.42543	4
15	Close	new\food\steak.jpg	8	1.10799	3
15	Close	new\food\past.jpg	9	1.71658	3
15	Close	new\food\hamburger.jpg	9	1.05952	2
15	Close	new\food\strawberry.jpg	9	1.29135	5
15	Close	new\food\steak.jpg	8	1.20803	3
15	Close	new\food\donut.jpg	7	1.20926	5
15	Close	new\food\chocolatecake.jpg	9	1.14053	5
15	Close	new\food\macaroni.jpg	9	0.976714	4
15	Close	new\food\tomato.jpg	8	1.79272	4
15	Close	new\food\croissant.jpg	8	1.20913	5
15	Close	new\food\macaroni.jpg	9	1.02686	5
15	Close	new\food\chocolatecake.jpg	9	1.02483	3
15	Close	new\food\past.jpg	9	0.933379	4
15	Close	new\food\parfait.jpg	9	1.55082	5
15	Close	new\food\pie.jpg	6	1.42552	4
15	Close	new\food\pie.jpg	6	1.19152	3
15	Close	new\food\pizza.jpg	9	1.85912	4
15	Close	new\food\cherry.jpg	7	1.60074	5
16	Open	new\food\orange.jpg	6	1.22545	5
16	Open	new\food\parfait.jpg	7	5.13864	3
16	Open	new\food\tomato.jpg	7	0.975045	4
16	Open	new\food\chocolatecake.jpg	9	1.95759	5
16	Open	new\food\pancake.jpg	7	1.10929	2
16	Open	new\food\croissant.jpg	9	0.908748	4
16	Open	new\food\pancake.jpg	8	1.14237	4
16	Open	new\food\chocolateice.jpg	4	1.6748	4
16	Open	new\food\donut.jpg	5	0.942321	4
16	Open	new\food\strawberry.jpg	6	0.992059	5
16	Open	new\food\macaroni.jpg	9	0.626049	4
16	Open	new\food\kissh.jpg	9	0.656756	3
16	Open	new\food\chocolateice.jpg	4	1.4931	4
16	Open	new\food\donut.jpg	5	1.12573	5
16	Open	new\food\shushimaki.jpg	3	0.934044	5
16	Open	new\food\parfait.jpg	6	1.01575	4
16	Open	new\food\macaroni.jpg	8	0.692058	3
16	Open	new\food\cherry.jpg	9	0.809902	4
16	Open	new\food\shushi.jpg	6	1.15857	5
16	Open	new\food\shushi.jpg	6	1.10745	6
16	Open	new\food\hamburger.jpg	9	0.891886	3
16	Open	new\food\pizza.jpg	5	2.30755	4
16	Open	new\food\past.jpg	9	0.726252	5
16	Open	new\food\shushimaki.jpg	3	1.30071	5
16	Open	new\food\pie.jpg	8	1.19094	6
16	Open	new\food\hamburger.jpg	9	0.759384	3
16	Open	new\food\chocolatecake.jpg	9	0.657325	4
16	Open	new\food\croissant.jpg	9	0.808864	3
16	Open	new\food\ice.jpg	4	1.16734	4
16	Open	new\food\steak.jpg	9	0.590443	2
16	Open	new\food\kissh.jpg	9	0.690499	3
16	Open	new\food\strawberry.jpg	6	1.54178	3
16	Open	new\food\tomato.jpg	5	1.99135	4
16	Open	new\food\cherry.jpg	9	0.592927	5
16	Open	new\food\steak.jpg	9	1.04018	4
16	Open	new\food\ice.jpg	3	0.88409	3
16	Open	new\food\past.jpg	8	1.39289	5
16	Open	new\food\pizza.jpg	5	1.1576	3
16	Open	new\food\pie.jpg	6	1.52351	4
16	Open	new\food\orange.jpg	6	1.02558	3
16	Close	new\food\shushimaki.jpg	2	1.13433	2
16	Close	new\food\kissh.jpg	9	0.65746	3
16	Close	new\food\tomato.jpg	7	1.02488	3
16	Close	new\food\parfait.jpg	6	1.13265	2
16	Close	new\food\chocolateice.jpg	4	1.04961	5
16	Close	new\food\shushi.jpg	7	1.25845	4
16	Close	new\food\pancake.jpg	6	1.42598	4
16	Close	new\food\pancake.jpg	6	0.843308	5
16	Close	new\food\donut.jpg	5	1.34259	4
16	Close	new\food\croissant.jpg	8	1.17517	4
16	Close	new\food\hamburger.jpg	9	0.79283	4
16	Close	new\food\pizza.jpg	5	1.37499	5
16	Close	new\food\orange.jpg	6	1.62529	6
16	Close	new\food\orange.jpg	6	0.908841	4
16	Close	new\food\ice.jpg	4	1.06762	4
16	Close	new\food\ice.jpg	6	1.4342	5
16	Close	new\food\shushi.jpg	6	0.992387	6
16	Close	new\food\cherry.jpg	9	1.39315	3
16	Close	new\food\shushimaki.jpg	3	1.06764	5
16	Close	new\food\kissh.jpg	9	0.923586	6
16	Close	new\food\chocolateice.jpg	3	1.38282	6
16	Close	new\food\strawberry.jpg	6	5.34279	5
16	Close	new\food\steak.jpg	9	0.873858	4
16	Close	new\food\past.jpg	8	1.23263	2
16	Close	new\food\hamburger.jpg	9	1.59185	4
16	Close	new\food\strawberry.jpg	6	1.27562	5
16	Close	new\food\steak.jpg	9	0.59077	4
16	Close	new\food\donut.jpg	5	1.25939	5
16	Close	new\food\chocolatecake.jpg	9	1.00789	5
16	Close	new\food\macaroni.jpg	9	0.959195	6
16	Close	new\food\tomato.jpg	6	1.04222	4
16	Close	new\food\croissant.jpg	8	0.876014	6
16	Close	new\food\macaroni.jpg	9	0.776098	4
16	Close	new\food\chocolatecake.jpg	9	0.757977	5
16	Close	new\food\past.jpg	8	1.12681	6
16	Close	new\food\parfait.jpg	6	1.20013	4
16	Close	new\food\pie.jpg	8	0.957946	3
16	Close	new\food\pie.jpg	7	1.15733	4
16	Close	new\food\pizza.jpg	5	1.95627	4
16	Close	new\food\cherry.jpg	9	0.899683	4
17	Open	new\food\orange.jpg	2	4.13747	5
17	Open	new\food\parfait.jpg	3	1.18309	6
17	Open	new\food\tomato.jpg	4	2.77593	2
17	Open	new\food\chocolatecake.jpg	3	2.40803	2
17	Open	new\food\pancake.jpg	3	2.93962	2
17	Open	new\food\croissant.jpg	7	1.60805	2
17	Open	new\food\pancake.jpg	3	2.52735	4
17	Open	new\food\chocolateice.jpg	3	2.44963	5
17	Open	new\food\donut.jpg	3	1.74318	2
17	Open	new\food\strawberry.jpg	3	1.52558	5
17	Open	new\food\macaroni.jpg	5	1.77493	4
17	Open	new\food\kissh.jpg	4	1.8565	3
17	Open	new\food\chocolateice.jpg	3	1.57698	4
17	Open	new\food\donut.jpg	2	1.65944	3
17	Open	new\food\shushimaki.jpg	4	2.60094	5
17	Open	new\food\parfait.jpg	3	3.66758	3
17	Open	new\food\macaroni.jpg	5	2.4422	4
17	Open	new\food\cherry.jpg	2	2.74254	5
17	Open	new\food\shushi.jpg	8	2.47498	3
17	Open	new\food\shushi.jpg	8	1.30919	2
17	Open	new\food\hamburger.jpg	6	2.55939	5
17	Open	new\food\pizza.jpg	7	2.19179	3
17	Open	new\food\past.jpg	3	1.59279	4
17	Open	new\food\shushimaki.jpg	3	2.10118	3
17	Open	new\food\pie.jpg	6	2.90832	5
17	Open	new\food\hamburger.jpg	5	2.02639	3
17	Open	new\food\chocolatecake.jpg	5	1.95795	2
17	Open	new\food\croissant.jpg	4	2.25925	6
17	Open	new\food\ice.jpg	2	1.41695	6
17	Open	new\food\steak.jpg	7	2.77419	4
17	Open	new\food\kissh.jpg	5	1.32384	4
17	Open	new\food\strawberry.jpg	3	3.37658	4
17	Open	new\food\tomato.jpg	7	1.95924	4
17	Open	new\food\cherry.jpg	2	1.62655	4
17	Open	new\food\steak.jpg	7	5.04133	4
17	Open	new\food\ice.jpg	3	1.53394	5
17	Open	new\food\past.jpg	4	2.36058	4
17	Open	new\food\pizza.jpg	6	1.60786	4
17	Open	new\food\pie.jpg	7	1.84087	4
17	Open	new\food\orange.jpg	3	3.27606	3
17	Close	new\food\shushimaki.jpg	5	1.85103	5
17	Close	new\food\kissh.jpg	2	2.19123	5
17	Close	new\food\tomato.jpg	8	1.6742	5
17	Close	new\food\parfait.jpg	4	2.28329	3
17	Close	new\food\chocolateice.jpg	3	2.62678	4
17	Close	new\food\shushi.jpg	8	1.25929	3
17	Close	new\food\pancake.jpg	3	1.31029	4
17	Close	new\food\pancake.jpg	3	1.7938	5
17	Close	new\food\donut.jpg	3	1.69298	3
17	Close	new\food\croissant.jpg	4	2.1429	4
17	Close	new\food\hamburger.jpg	5	2.06664	2
17	Close	new\food\pizza.jpg	5	1.92563	2
17	Close	new\food\orange.jpg	3	1.94251	2
17	Close	new\food\orange.jpg	3	2.21005	2
17	Close	new\food\ice.jpg	3	2.78432	5
17	Close	new\food\ice.jpg	4	1.86774	5
17	Close	new\food\shushi.jpg	8	1.50995	4
17	Close	new\food\cherry.jpg	2	1.61653	5
17	Close	new\food\shushimaki.jpg	4	1.51748	5
17	Close	new\food\kissh.jpg	3	2.90823	4
17	Close	new\food\chocolateice.jpg	3	3.1001	5
17	Close	new\food\strawberry.jpg	2	1.25958	5
17	Close	new\food\steak.jpg	7	2.00754	5
17	Close	new\food\past.jpg	5	2.37629	4
17	Close	new\food\hamburger.jpg	7	3.159	5
17	Close	new\food\strawberry.jpg	2	2.64162	3
17	Close	new\food\steak.jpg	7	2.00822	5
17	Close	new\food\donut.jpg	3	1.42642	3
17	Close	new\food\chocolatecake.jpg	3	2.49161	4
17	Close	new\food\macaroni.jpg	5	1.59304	4
17	Close	new\food\tomato.jpg	7	1.15911	3
17	Close	new\food\croissant.jpg	5	2.75931	2
17	Close	new\food\macaroni.jpg	3	2.48917	6
17	Close	new\food\chocolatecake.jpg	4	2.80889	5
17	Close	new\food\past.jpg	6	1.7435	5
17	Close	new\food\parfait.jpg	3	1.26663	4
17	Close	new\food\pie.jpg	6	2.90863	3
17	Close	new\food\pie.jpg	6	2.75738	3
17	Close	new\food\pizza.jpg	4	2.12544	3
17	Close	new\food\cherry.jpg	2	1.15964	5
18	Open	new\food\orange.jpg	6	3.89244	4
18	Open	new\food\parfait.jpg	6	2.19344	5
18	Open	new\food\tomato.jpg	6	1.57525	4
18	Open	new\food\chocolatecake.jpg	8	1.17441	5
18	Open	new\food\pancake.jpg	6	1.42455	3
18	Open	new\food\croissant.jpg	6	1.2402	4
18	Open	new\food\pancake.jpg	5	0.709746	5
18	Open	new\food\chocolateice.jpg	7	1.44318	5
18	Open	new\food\donut.jpg	5	3.24189	3
18	Open	new\food\strawberry.jpg	6	1.44234	4
18	Open	new\food\macaroni.jpg	6	1.22567	5
18	Open	new\food\kissh.jpg	6	0.806622	3
18	Open	new\food\chocolateice.jpg	6	1.49245	4
18	Open	new\food\donut.jpg	6	2.14238	5
18	Open	new\food\shushimaki.jpg	4	1.26767	5
18	Open	new\food\parfait.jpg	6	2.39925	5
18	Open	new\food\macaroni.jpg	6	2.75921	4
18	Open	new\food\cherry.jpg	6	2.07732	4
18	Open	new\food\shushi.jpg	7	1.1918	5
18	Open	new\food\shushi.jpg	7	1.42576	4
18	Open	new\food\hamburger.jpg	8	1.29217	2
18	Open	new\food\pizza.jpg	8	1.473	4
18	Open	new\food\past.jpg	5	1.85985	3
18	Open	new\food\shushimaki.jpg	4	4.47076	2
18	Open	new\food\pie.jpg	7	5.2076	5
18	Open	new\food\hamburger.jpg	7	6.04179	5
18	Open	new\food\chocolatecake.jpg	8	2.99119	5
18	Open	new\food\croissant.jpg	6	1.17508	5
18	Open	new\food\ice.jpg	7	2.76802	4
18	Open	new\food\steak.jpg	7	1.92417	3
18	Open	new\food\kissh.jpg	6	1.67357	4
18	Open	new\food\strawberry.jpg	6	2.24238	5
18	Open	new\food\tomato.jpg	5	7.95977	4
18	Open	new\food\cherry.jpg	6	2.73792	3
18	Open	new\food\steak.jpg	8	2.92338	3
18	Open	new\food\ice.jpg	7	1.06675	4
18	Open	new\food\past.jpg	6	2.0714	5
18	Open	new\food\pizza.jpg	8	4.67425	4
18	Open	new\food\pie.jpg	7	1.60722	4
18	Open	new\food\orange.jpg	5	4.1091	3
18	Close	new\food\shushimaki.jpg	4	3.16729	4
18	Close	new\food\kissh.jpg	6	3.73982	5
18	Close	new\food\tomato.jpg	7	2.992	3
18	Close	new\food\parfait.jpg	6	2.3834	5
18	Close	new\food\chocolateice.jpg	8	3.29264	5
18	Close	new\food\shushi.jpg	7	1.07572	3
18	Close	new\food\pancake.jpg	6	2.06003	3
18	Close	new\food\pancake.jpg	5	2.39255	5
18	Close	new\food\donut.jpg	6	2.14281	4
18	Close	new\food\croissant.jpg	7	4.10843	4
18	Close	new\food\hamburger.jpg	8	1.42585	4
18	Close	new\food\pizza.jpg	8	1.624	3
18	Close	new\food\orange.jpg	6	1.79214	3
18	Close	new\food\orange.jpg	6	2.22541	2
18	Close	new\food\ice.jpg	7	1.26727	3
18	Close	new\food\ice.jpg	7	1.21713	4
18	Close	new\food\shushi.jpg	7	2.07517	5
18	Close	new\food\cherry.jpg	6	2.34257	3
18	Close	new\food\shushimaki.jpg	4	4.08487	4
18	Close	new\food\kissh.jpg	6	2.17343	5
18	Close	new\food\chocolateice.jpg	8	1.28256	5
18	Close	new\food\strawberry.jpg	6	3.84185	4
18	Close	new\food\steak.jpg	7	2.72453	2
18	Close	new\food\past.jpg	7	2.69142	3
18	Close	new\food\hamburger.jpg	8	3.39295	4
18	Close	new\food\strawberry.jpg	6	1.75907	2
18	Close	new\food\steak.jpg	7	1.8408	5
18	Close	new\food\donut.jpg	6	1.22635	3
18	Close	new\food\chocolatecake.jpg	8	1.27463	5
18	Close	new\food\macaroni.jpg	7	2.54258	5
18	Close	new\food\tomato.jpg	6	1.64199	4
18	Close	new\food\croissant.jpg	6	1.24256	4
18	Close	new\food\macaroni.jpg	6	2.60942	5
18	Close	new\food\chocolatecake.jpg	7	1.19108	5
18	Close	new\food\past.jpg	6	4.56672	3
18	Close	new\food\parfait.jpg	6	1.69974	4
18	Close	new\food\pie.jpg	7	1.87472	5
18	Close	new\food\pie.jpg	7	1.10749	4
18	Close	new\food\pizza.jpg	8	1.57467	3
18	Close	new\food\cherry.jpg	6	1.82644	4
19	Open	new\food\orange.jpg	6	1.25896	5
19	Open	new\food\parfait.jpg	5	1.57477	5
19	Open	new\food\tomato.jpg	4	4.95875	3
19	Open	new\food\chocolatecake.jpg	5	1.7075	4
19	Open	new\food\pancake.jpg	4	1.41	5
19	Open	new\food\croissant.jpg	4	1.87558	5
19	Open	new\food\pancake.jpg	3	1.32473	4
19	Open	new\food\chocolateice.jpg	4	1.10829	4
19	Open	new\food\donut.jpg	5	2.0753	4
19	Open	new\food\strawberry.jpg	4	2.17532	2
19	Open	new\food\macaroni.jpg	5	3.52542	2
19	Open	new\food\kissh.jpg	3	1.0736	2
19	Open	new\food\chocolateice.jpg	4	2.23254	4
19	Open	new\food\donut.jpg	8	0.925448	3
19	Open	new\food\shushimaki.jpg	6	1.65113	4
19	Open	new\food\parfait.jpg	5	2.29946	5
19	Open	new\food\macaroni.jpg	3	2.57544	5
19	Open	new\food\cherry.jpg	6	3.02607	4
19	Open	new\food\shushi.jpg	4	2.17554	3
19	Open	new\food\shushi.jpg	7	1.63938	4
19	Open	new\food\hamburger.jpg	3	1.47602	5
19	Open	new\food\pizza.jpg	3	1.64062	6
19	Open	new\food\past.jpg	3	1.12655	3
19	Open	new\food\shushimaki.jpg	7	1.50126	4
19	Open	new\food\pie.jpg	7	1.17093	5
19	Open	new\food\hamburger.jpg	4	0.842123	5
19	Open	new\food\chocolatecake.jpg	4	2.15709	3
19	Open	new\food\croissant.jpg	6	1.39167	3
19	Open	new\food\ice.jpg	5	1.28308	4
19	Open	new\food\steak.jpg	4	4.24102	3
19	Open	new\food\kissh.jpg	5	2.44048	4
19	Open	new\food\strawberry.jpg	5	3.71901	2
19	Open	new\food\tomato.jpg	7	1.52526	3
19	Open	new\food\cherry.jpg	4	1.22641	3
19	Open	new\food\steak.jpg	4	2.07414	4
19	Open	new\food\ice.jpg	4	1.45002	5
19	Open	new\food\past.jpg	2	1.39319	4
19	Open	new\food\pizza.jpg	4	1.37472	3
19	Open	new\food\pie.jpg	5	1.52429	5
19	Open	new\food\orange.jpg	7	1.92546	3
19	Close	new\food\shushimaki.jpg	7	2.45123	4
19	Close	new\food\kissh.jpg	6	1.69078	3
19	Close	new\food\tomato.jpg	6	1.52348	2
19	Close	new\food\parfait.jpg	6	2.63331	3
19	Close	new\food\chocolateice.jpg	4	2.79951	3
19	Close	new\food\shushi.jpg	7	1.77551	4
19	Close	new\food\pancake.jpg	4	0.923962	5
19	Close	new\food\pancake.jpg	4	1.65908	4
19	Close	new\food\donut.jpg	6	1.55917	2
19	Close	new\food\croissant.jpg	7	4.17624	2
19	Close	new\food\hamburger.jpg	3	0.891545	2
19	Close	new\food\pizza.jpg	4	1.52473	2
19	Close	new\food\orange.jpg	8	1.30866	2
19	Close	new\food\orange.jpg	8	0.891871	3
19	Close	new\food\ice.jpg	3	1.31701	2
19	Close	new\food\ice.jpg	7	1.14959	4
19	Close	new\food\shushi.jpg	7	1.10516	4
19	Close	new\food\cherry.jpg	4	1.47619	5
19	Close	new\food\shushimaki.jpg	7	1.35005	6
19	Close	new\food\kissh.jpg	3	0.790806	3
19	Close	new\food\chocolateice.jpg	4	1.35986	5
19	Close	new\food\strawberry.jpg	6	1.50878	6
19	Close	new\food\steak.jpg	6	4.67487	6
19	Close	new\food\past.jpg	4	1.09936	5
19	Close	new\food\hamburger.jpg	4	3.69419	4
19	Close	new\food\strawberry.jpg	6	1.7257	3
19	Close	new\food\steak.jpg	5	1.30735	4
19	Close	new\food\donut.jpg	8	1.79222	5
19	Close	new\food\chocolatecake.jpg	4	1.90827	4
19	Close	new\food\macaroni.jpg	6	1.47621	5
19	Close	new\food\tomato.jpg	4	3.29275	5
19	Close	new\food\croissant.jpg	5	1.14254	6
19	Close	new\food\macaroni.jpg	4	3.22623	4
19	Close	new\food\chocolatecake.jpg	7	1.19102	6
19	Close	new\food\past.jpg	2	1.09253	4
19	Close	new\food\parfait.jpg	7	2.12531	5
19	Close	new\food\pie.jpg	8	1.04087	6
19	Close	new\food\pie.jpg	7	1.29093	4
19	Close	new\food\pizza.jpg	3	0.857092	3
19	Close	new\food\cherry.jpg	3	1.78265	4
